# Supplementary material
Source: PubMed Central journal article supplement (PMC1852839)

Supplemental Figure 1

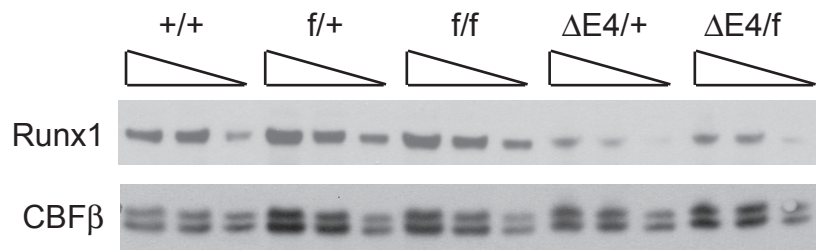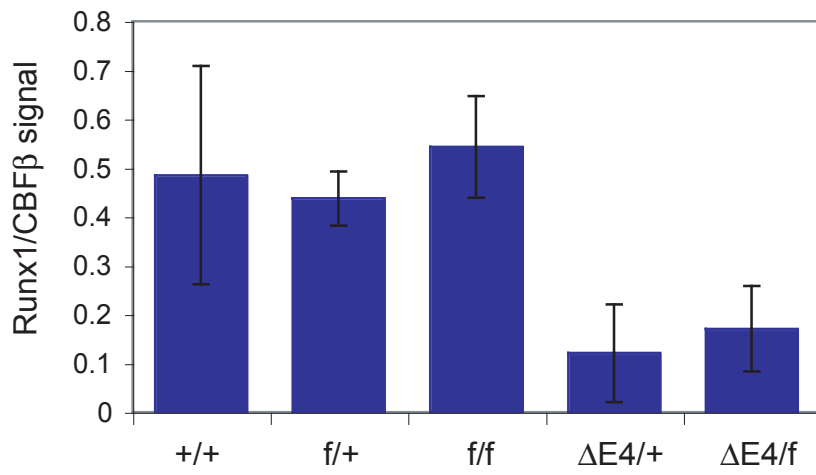

Supplement: 7601568s2.pdf [file 7601568s2.pdf]

Supplemental Figure 2

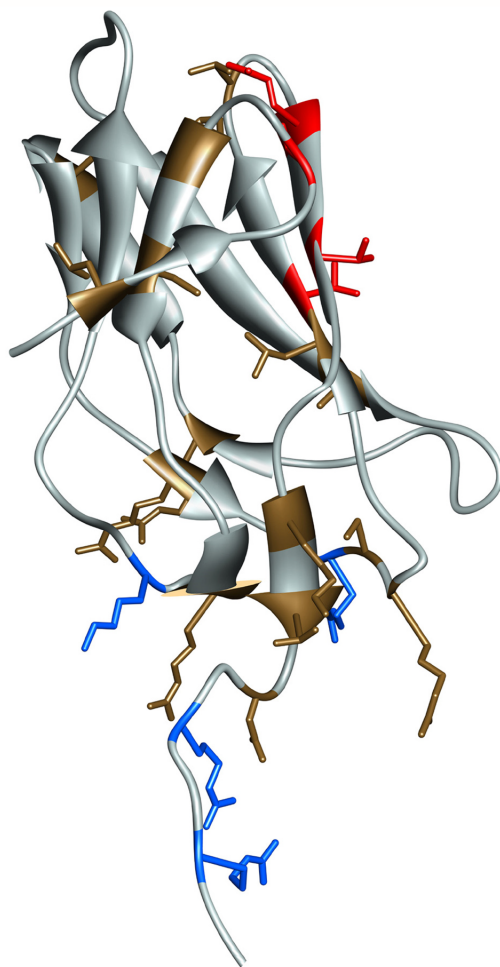

Supplement: 7601568s3.pdf [file 7601568s3.pdf]
